# Supplementary material
Source: ML conference proceedings conference paper supplement (https://proceedings.neurips.cc/paper_files/paper/2014/hash/d554f7bb7be44a7267068a7df88ddd20-Abstract.html)
Supplement: Supplementary file [file d554f7bb7be44a7267068a7df88ddd20-Supplemental.zip]

---

# Supplementary Materials: Stochastic Proximal Gradient Descent with Acceleration Techniques

---

**Atsushi Nitanda**  
 NTT DATA Mathematical Systems Inc.  
 1F Shinanomachi Rengakan, 35,  
 Shinanomachi, Shinjuku-ku, Tokyo,  
 160-0016, Japan  
 nitanda@msi.co.jp

## 1 Proofs of the first half of Lemma 1 and Lemma 2

Before we prove lemmas, we again give the definition of estimate sequence and its basic properties.

$$\begin{aligned}
 \Phi_1(x) &= f(x_1) + \frac{\mu}{2} \|x - x_1\|^2, \\
 \Phi_{k+1}(x) &= (1 - \sqrt{\mu\eta})\Phi_k(x) + \sqrt{\mu\eta}(g_{I_k}(y_k) + (v_k, x - y_k) + \frac{\mu}{2} \|x - y_k\|^2 \\
 &\quad + h(x_{k+1}) + (\xi_k, x - x_{k+1})), \quad k \geq 1.
 \end{aligned}$$

We set

$$\Phi_k^* = \min_{x \in \mathbb{R}^d} \Phi_k(x), \quad z_k = \arg \min_{x \in \mathbb{R}^d} \Phi_k(x).$$

Since  $\nabla^2 \Phi_k(x) = \mu I_n$ , it follows that for  $\forall x \in \mathbb{R}^d$

$$\Phi_k(x) = \frac{\mu}{2} \|x - z_k\|^2 + \Phi_k^*. \quad (1)$$

Now we give the proof of first half of Lemma 1.

*Proof of the first half of Lemma 1.* We see that (9) of Lemma 1 is true for  $k = 1$ , and we assume it is true for  $k$ . From the definition of estimate sequence, we have

$$\begin{aligned}
 \mathbb{E}[\Phi_{k+1}(x)] &= (1 - \sqrt{\mu\eta})\mathbb{E}[\Phi_k(x)] + \sqrt{\mu\eta} \mathbb{E}[g_{I_k}(y_k) + (v_k, x - y_k) \\
 &\quad + \frac{\mu}{2} \|x - y_k\|^2 + h(x_{k+1}) + (\xi_k, x - x_{k+1})] \\
 &\leq (1 - \sqrt{\mu\eta})f(x) + (1 - \sqrt{\mu\eta})^k(\Phi_1 - f)(x) \\
 &\quad + \sqrt{\mu\eta} \mathbb{E}\left[g(y_k) + (\nabla g(y_k), x - y_k) + \frac{\mu}{2} \|x - y_k\|^2 + h(x_{k+1}) + (\xi_k, x - x_{k+1})\right] \\
 &\leq (1 - \sqrt{\mu\eta})f(x) + (1 - \sqrt{\mu\eta})^k(\Phi_1 - f)(x) + \sqrt{\mu\eta}(g(x) + h(x)) \\
 &= f(x) + (1 - \sqrt{\mu\eta})^k(\Phi_1 - f)(x),
 \end{aligned}$$

where for the first inequality we used induction hypothesis,  $\mathbb{E}_{I_k}[g_{I_k}(y_k)] = \mathbb{E}[g(y_k)]$  and  $\mathbb{E}_{I_k}[v_k] = \mathbb{E}[\nabla g(y_k)]$ , for the last inequality we used the convexity of  $g$  and  $h$ . Hence, the first half of Lemma (9) follows.  $\square$

Next, we give the proof of Lemma 2.

*Proof of Lemma 2.* From the definition of estimate sequence and (1), we have that for  $k \geq 1$

$$\begin{aligned} \frac{\mu}{2} \|x - z_{k+1}\|^2 + \Phi_{k+1}^* &= (1 - \sqrt{\mu\eta}) \left( \frac{\mu}{2} \|x - z_k\|^2 + \Phi_k^* \right) + \sqrt{\mu\eta} \left( g_{I_k}(y_k) + (v_k, x - y_k) \right) \\ &\quad + \frac{\mu}{2} \|x - y_k\|^2 + h(x_{k+1}) + (\xi_k, x - x_{k+1}). \end{aligned}$$

By differentiating at  $y_k$  this equality, we obtain

$$\mu(y_k - z_{k+1}) = (1 - \sqrt{\mu\eta})\mu(y_k - z_k) + \sqrt{\mu\eta}(v_k + \xi_k).$$

Hence, we have

$$z_{k+1} = (1 - \sqrt{\mu\eta})z_k + \sqrt{\mu\eta}y_k - \sqrt{\frac{\eta}{\mu}}(v_k + \xi_k),$$

and that is exactly (11) of Lemma 2. Next, we prove (12) of Lemma 2 by induction. It is true for  $k = 1$ . We assume it is true for  $k$ , then it follows from (11) of Lemma 2 that,

$$\begin{aligned} z_{k+1} - y_{k+1} &= (1 - \sqrt{\mu\eta})z_k + \sqrt{\mu\eta}y_k - \sqrt{\frac{\eta}{\mu}}(v_k + \xi_k) - y_{k+1} \\ &= \frac{1}{\sqrt{\mu\eta}}(y_k - \eta(v_k + \xi_k)) - \frac{1 - \sqrt{\mu\eta}}{\sqrt{\mu\eta}}x_k - y_{k+1} \\ &= \frac{1}{\sqrt{\mu\eta}}x_{k+1} - \frac{1 - \sqrt{\mu\eta}}{\sqrt{\mu\eta}}x_k - y_{k+1}. \end{aligned}$$

From the update rule of  $y_{k+1}$ , we have

$$\begin{aligned} -\frac{1 - \sqrt{\mu\eta}}{\sqrt{\mu\eta}}x_k &= \frac{1 + \sqrt{\mu\eta}}{\sqrt{\mu\eta}} \left( y_{k+1} - \left( 1 + \frac{1 - \sqrt{\mu\eta}}{1 + \sqrt{\mu\eta}} \right) x_{k+1} \right) \\ &= \frac{1 + \sqrt{\mu\eta}}{\sqrt{\mu\eta}}y_{k+1} - \frac{2}{\sqrt{\mu\eta}}x_{k+1}. \end{aligned}$$

Hence, we get

$$z_{k+1} - y_{k+1} = \frac{1}{\sqrt{\mu\eta}}(y_{k+1} - x_{k+1}).$$

□

## 2 Proof of Lemma 3

We prove Lemma 3.

*Proof of Lemma 3. Averaging*

$$(\nabla g(y_k) + \xi_k, v_k + \xi_k) = \|\nabla g(y_k) + \xi_k\|^2 + (\nabla g(y_k) + \xi_k, v_k - \nabla g(y_k))$$

and

$$(\nabla g(y_k) + \xi_k, v_k + \xi_k) = \|v_k + \xi_k\|^2 + (v_k + \xi_k, \nabla g(y_k) - v_k),$$

we get (13) of Lemma 3:

$$(\nabla g(y_k) + \xi_k, v_k + \xi_k) = \frac{1}{2} (\|\nabla g(y_k) + \xi_k\|^2 + \|v_k + \xi_k\|^2 - \|\nabla g(y_k) - v_k\|^2).$$

(14) of Lemma 3 is shown as follows:

$$\begin{aligned} \|v_k + \xi_k\|^2 &= \|v_k + \xi_k + \nabla g(y_k) + \xi_k - (\nabla g(y_k) + \xi_k)\|^2 \\ &= \|\nabla g(y_k) + \xi_k\|^2 + 2(\nabla g(y_k) + \xi_k, v_k - \nabla g(y_k)) + \|v_k - \nabla g(y_k)\|^2 \\ &\leq 2(\|\nabla g(y_k) + \xi_k\|^2 + \|v_k - \nabla g(y_k)\|^2). \end{aligned}$$

In the last inequality, we use

$$|(a, b)| \leq \frac{\|a\|^2 + \|b\|^2}{2}, \quad \text{for } \forall a, \forall b \in \mathbb{R}^d.$$

Inequality (15) of Lemma 3 can be proved in a similar way.

□

### 3 Proof of Lemma 4

Lemma 4 is the key lemma which give a bound on the variance. Now we give the proof.

*Proof of Lemma 4.* We set  $v_j^1 = \nabla g_j(y_k) - \nabla g_j(\tilde{x}) + \tilde{v}$ . Since

$$v_k = \frac{1}{b} \sum_{j \in I_k} v_j^1,$$

conditional variance of  $v_k$  is as follows (see [1, p.183])

$$\mathbb{E}_{I_k} \|v_k - \nabla g(y_k)\|^2 = \frac{1}{b} \frac{n-b}{n-1} \mathbb{E}_j \|v_j^1 - \nabla g(y_k)\|^2,$$

where expectation in right hand side is taken with respect to  $j \in \{1, \dots, n\}$ . Therefore, it suffices to prove that

$$\mathbb{E}_j \|v_j^1 - \nabla g(y_k)\|^2 \leq 2L^2 \|y_k - x_k\|^2 + 8L(f(x_k) - f(x_*) + f(\tilde{x}) - f(x_*)). \quad (2)$$

For  $i \in \{1, \dots, n\}$ , we set

$$\phi_i(x) = g_i(x) - (g_i(x_*) + (\nabla g_i(x_*), x - x_*)).$$

We have that  $\phi_i(x_*) = \min_x \phi_i(x)$  since  $\nabla \phi_i(x_*) = 0$  and convexity of  $\phi_i$ . Since  $\nabla \phi_i$  is Lipschitz continuous with  $L$ , it follows that (see [2, Theorem 2.1.5])

$$\frac{1}{2L} \|\nabla \phi_i(x)\|^2 \leq \phi_i(x) - \phi_i(x_*) = \phi_i(x),$$

Thus,

$$\|\nabla g_i(x) - \nabla g_i(x_*)\|^2 \leq 2L(g_i(x) - g_i(x_*) - (\nabla g_i(x_*), x - x_*)).$$

Averaging from  $i = 1$  to  $n$ , we have

$$\frac{1}{n} \sum_{i=1}^n \|\nabla g_i(x) - \nabla g_i(x_*)\|^2 \leq 2L(g(x) - g(x_*) - (\nabla g(x_*), x - x_*)).$$

By the optimality of  $x_*$ ,  $-\nabla g(x_*)$  is a subgradient of  $h$  at  $x_*$ , so that

$$(-\nabla g(x_*), x - x_*) \leq h(x) - h(x_*).$$

Hence we get

$$\frac{1}{n} \sum_{i=1}^n \|\nabla g_i(x) - \nabla g_i(x_*)\|^2 \leq 2L(g(x) - g(x_*) + h(x) - h(x_*)) = 2L(f(x) - f(x_*)). \quad (3)$$

We now bound left hand side of (2) as follows:

$$\begin{aligned} \mathbb{E}_j \|v_j^1 - \nabla g(y_k)\|^2 &= \mathbb{E}_j \|\nabla g_j(y_k) - \nabla g_j(\tilde{x}) - (\nabla g(y_k) - \nabla g(\tilde{x}))\|^2 \\ &\leq \mathbb{E}_j \|\nabla g_j(y_k) - \nabla g_j(\tilde{x})\|^2 \\ &\leq 2\mathbb{E}_j \|\nabla g_j(y_k) - \nabla g_j(x_k)\|^2 + 4\mathbb{E}_j \|\nabla g_j(x_k) - \nabla g_j(x_*)\|^2 + 4\mathbb{E}_j \|\nabla g_j(x_*) - \nabla g_j(\tilde{x})\|^2 \\ &\leq 2L^2 \|y_k - x_k\|^2 + 8L(f(x_k) - f(x_*) + f(\tilde{x}) - f(x_*)), \end{aligned}$$

where for the first inequality we used  $\mathbb{E} \|\zeta - \mathbb{E}\zeta\|^2 \leq \mathbb{E} \|\zeta\|^2$  for any random vector  $\zeta$ , for the second inequality, we used  $\|a + b\|^2 \leq 2\|a\|^2 + 2\|b\|^2$ , and for the last inequality, we used  $L$ -Lipschitz continuity and (3). This finishes the proof of lemma.  $\square$

### References

- [1] J. E. Freund. *Mathematical Statistics*. prentice Hall, 1962.
- [2] Y. Nesterov. *Introductory Lectures on Convex Optimization: A Basic Course*. Kluwer, Boston, 2004.
